1 **Trends and projections of universal health coverage indicators in Ghana, 1995-**  
2 **2030: A national and subnational study**

3 Cherri Zhang<sup>1</sup>, Md. Shafiur Rahman<sup>1</sup>, Md. Mizanur Rahman<sup>1,2</sup>, Alfred E Yawson<sup>3</sup>, Kenji  
4 Shibuya<sup>1,4</sup>

5 <sup>1</sup>Department of Global Health Policy, The University of Tokyo, Tokyo, Japan

6 <sup>2</sup>Department of Population Science and Human Resource Development, University of Rajshahi,  
7 Rajshahi, Bangladesh

8 <sup>3</sup>Department of Community Health, School of Public Health, University of Ghana, Accra, Ghana

9 <sup>4</sup>Institute for Global Health Policy Research, Tokyo, Japan

10 \*Corresponding author

11 Department of Global Health Policy

12 The University of Tokyo

13 Tokyo, Japan

14 E-mail: [toki.cherri.zhan28@gmail.com](mailto:toki.cherri.zhan28@gmail.com)

15 **Acknowledgements:** The author thank the Department of Global Health Policy at The

16 University of Tokyo, School of Public Health at the University of Ghana, professors, assistant

17 professor, and fellow lab mate for their assistance. The author also thanks the Ghana Statistical

18 Service for surveys and data.

19  
20  
21  
22  
23  
24  
25  
26  
27  
28  
29  
30  
31  
32  
33  
34  
35  
36  
37  
38  
39  
40  
41

## Abstract

Ghana has made significant stride towards universal health coverage (UHC) by implementing the National Health Insurance Scheme (NHIS) in 2003. This paper investigates the progress of UHC indicators in Ghana from 1995 to 2030 and makes future predictions up to 2030 to assess the probability of achieving UHC targets. National representative surveys of Ghana were used to assess health service coverage and financial risk protection. The analysis estimated the coverage of 13 prevention and four treatment service indicators at the national level and across wealth quintiles. In addition, this analysis calculated catastrophic health payments and impoverishment to assess financial hardship and used a Bayesian regression model to estimate trends and future projections as well as the probabilities of achieving UHC targets by 2030. Wealth-based inequalities and regional disparities were also assessed. At the national level, 14 out of the 17 health service indicators are projected to reach the target of 80% coverage by 2030. Across wealth quintiles, inequalities were observed amongst most indicators with richer groups obtaining more coverage than their poorer counterparts. Subnational analysis revealed while all regions will achieve the 80% coverage target with high probabilities for prevention services, the same cannot be applied to treatment services. In 2015, the proportion of households that suffered catastrophic health payments and impoverishment at a threshold of 25% non-food expenditure were 1.9% (95%CrI: 0.9-3.5) and 0.4% (95%CrI: 0.2-0.8), respectively. These are projected to reduce to less than 0.5% by 2030. Inequality measures and subnational assessment revealed that catastrophic expenditure experienced by wealth quintiles and regions are not equal. Significant improvements were seen in both health service coverage and financial risk protection as a result of NHIS. However, inequalities across wealth quintiles and at the subnational level continue to be cause of concerns. Further efforts are needed to narrow these inequality gaps.

## 42 **Introduction**

43 Universal Health Coverage (UHC) is a concept in which all people receive the quality, essential  
44 services they need without experiencing financial hardship [1,2]. The First Global Monitoring  
45 Report formulated by World Health Organizations (WHO) and World Bank identified three  
46 dimensions: population, health services, and financing through risk pooling mechanism to track  
47 UHC progress [1]. Since its integration into the recently adopted Sustainable Development Goal  
48 (SDG) 3, member countries of the United Nations (UN) have committed to achieve UHC by  
49 2030 [3]. This commitment consists of two targets: a minimum of 80% essential health service  
50 coverage for all people, regardless of socioeconomic status, and 100% financial risk protection  
51 from out-of-pocket (OOP) payments for health care [1]. UHC is a key mechanism to ensure  
52 affordability and equity as well as to guarantee resilient health system, which many countries  
53 have embraced in order to achieve better health for all [1].

54 Achieving UHC in Sub-Saharan Africa should be of utmost priority as countries in this region  
55 trail significantly behind in achieving health outcomes especially the Millennium Development  
56 Goals (MDGs) formulated by the WHO. Moreover, millions of Africans fall into poverty  
57 annually due to OOP payment as a result of lack of health insurance in health financing system  
58 [4,5]. Ghana, being one of the few Sub-Saharan African countries advocating for UHC,  
59 implemented the National Health Insurance Scheme (NHIS) in 2003, in an attempt to remove  
60 financial barriers, protect Ghanaians from catastrophic expenditure, and improve access for  
61 everyone [6]. NHIS is mainly funded by three sources: 70% of National Insurance Levy (NIL),  
62 17.4% of Social Security and National Insurance Trust (SSNIT), and 4.5% of premium payments  
63 [7]. NIL is a 2.5% tax on selected goods and services; SSNIT is a 2.5% contribution paid by  
64 those in the formal sectors, and premium is set at an annual flat rate of \$4.8 USD to \$32 USD

65 depending on districts for those in the informal sectors [8]. Pregnant women and those under the  
66 age of 18 years or over 70 years of age are exempt from premium and makes up 60% of the  
67 enrollees [8].

68 Services covered under the insurance include outpatient and inpatient care, oral health, eye care,  
69 maternity care, and emergencies with no copayment upon receipt of service. It excludes cosmetic  
70 services, HIV antiretroviral drugs, orthopedics, and organ transplant etc. [9]. Despite enrollment  
71 into NHIS being mandatory, overall enrollment remains low at 40% as of 2016 since majority of  
72 the population belongs to the informal sector, and there is a lack of formal tracking regulations  
73 [7]. Although Ghana made significant stride towards health financing in recent years; however,  
74 Gross Domestic Product (GDP) spending on health and total government expenditure allocated  
75 to health has dropped since 2010 to 3.6% and 6.8%, respectively in 2014 [10]. Furthermore,  
76 other challenges such as funding and sustainability persist as overall enrollment has decreased in  
77 recent years and many citizens find paying for premiums difficult. In addition, as the incidence  
78 of poverty is around 25% with some regions such as Upper East and Upper West experiencing  
79 more than 70% incidence of poverty, inequality remains a prominent issue especially across  
80 regions [9]. Inadequate funding for health can lead to unstable health insurance scheme and an  
81 increase in OOP payments pushing people further into poverty and resulting in worse health  
82 outcomes.

83 Most studies conducted in Ghana thus far assessed the impact of NHIS either on health service  
84 access or protection against financial catastrophe; therefore, this paper offers a comprehensive  
85 glimpse into Ghana's progress towards both UHC components, along with future trajectories. It  
86 will provide a thorough examination on the proportion of health service utilization as well as

87 catastrophic health expenditures at the national and subnational level as well as across wealth  
88 quintiles using nationally representative survey data.

## 89 **Methods**

### 90 *Data source*

91 Analysis on health service coverage was carried out using five consecutive Demographic and  
92 Health Surveys (1993, 1998, 2003, 2008, and 2014). These are nationally representative  
93 household surveys covering all 10 regions of Ghana. Information mainly on housing and  
94 household characteristics, education, maternal and child health, fertility, family planning, and  
95 nutrition were collected. The analysis of financial risk protection was conducted using Ghana  
96 Living Standard Surveys (1991-1992, 1998-1999, 2005-2006, and 2012-2013), which are  
97 nationwide household surveys constructed to gather information on living conditions in Ghana.  
98 The surveys collected detailed information on household demographics, education, health,  
99 employment, migration, housing conditions, agriculture, and access to financial services and  
100 asset ownership. Both national surveys involved two-staged random sampling design with high  
101 response rates (Table in S11 Table).

### 102 *Measurement of health service indicators*

103 In accordance with WHO and World Bank's framework [1], 17 health service indicators (Table  
104 in S1 Table) were chosen to cover a full range of prevention and treatment services based on data  
105 availability. In all, 13 indicators were classified as prevention services while four indicators were  
106 classified as treatment services. The chosen indicators were grouped into: 1) composite  
107 prevention index and 2) composite treatment index. These were estimated as the mean value of  
108 prevention and treatment service indicators to trace the overall progress of prevention and

109 treatment coverage [11]. Due to incomplete data for some of the indicators in certain survey  
110 years, only nine out of the 13 prevention indicators (four antenatal care visits, exclusive  
111 breastfeeding, needs for family planning satisfaction, improved water, adequate sanitation, BCG,  
112 measles, DPT3 and Polio3 immunizations) were included to estimate the composite prevention  
113 index. Furthermore, a Composite Coverage Index (CCI) was estimated to assess access to  
114 maternal and child health services as it frequently represents frontline measurement of health  
115 service coverage and produce the most immediate picture of accessibility [11,12]. It was  
116 calculated based on eight interventions from four specialties (family planning, maternity care,  
117 child malnutrition, and case management) using a formula developed by Boerma and colleagues  
118 [12].

#### 119 *Measurement of financial hardship*

120 Incidence of catastrophic health expenditure (CHE) and impoverishment due to OOP health  
121 payments were approximated for financial hardship assessment. Several thresholds can be  
122 considered according to World Bank's guideline [13]. In this analysis, a threshold of 25% non-  
123 food consumption expenditure was used; therefore, a household's health expenditure was  
124 deemed catastrophic if its total OOP health payments exceeded that threshold. Consistent with  
125 WHO's guideline [14], the incidence of impoverishment was derived using poverty line and  
126 subsistence spending. A household was considered poor if its total per capita expenditure was  
127 less than its subsistence spending after paying for healthcare, and thus a household's health  
128 expenditure was considered impoverishing if its total per capita spending after paying for health  
129 care was below the poverty line [14]. The poverty line was determined using average food  
130 expenditure of households with food expenditure share within 45<sup>th</sup> and 55<sup>th</sup> percentile of the  
131 sampled households [14]. A household was deemed to be experiencing hardship if it encountered

132 either CHE or impoverishment. All household consumption calculations were performed  
133 following Living Standard Measurement Study guideline [13].

#### 134 *Statistical analysis*

135 All trends and projections for health service coverage and financial risk protection components  
136 were estimated based on proportions estimated from original survey data with 95% confidence  
137 interval (CI). The composite prevention and treatment indices were developed based on random-  
138 effects meta-analysis [15]. For equity analysis, households were divided into five wealth  
139 quintiles (Q1-Q5) to assess socio-economic status. Due to the lack of information on income as  
140 most Ghanaians belong to the informal sector, household economic status was measured based  
141 on the level of consumption or asset-based wealth index. The index was constructed from  
142 household asset data using principle components analysis and a wealth score was generated for  
143 each household. This information was provided for households in the Demographic and Health  
144 Surveys as well as Ghana Living Standard Measurement Surveys. Households were ranked  
145 based on wealth scores and divided into quintiles, starting from the poorest quintile (lowest 20%)  
146 to the richest quintile (highest 20%). The slope index of inequality (SII) and relative index of  
147 inequality (RII) were calculated to provide an absolute and relative measure of inequality,  
148 respectively. SII measures the absolute difference between the extremes of wealth quintiles and  
149 reflects the difference in percentage points in each indicator, while RII is a measure of ratio  
150 signifying the degree of inequality [11]. SII and RII were calculated by regressing outcomes of  
151 health service and financial indicators against household's relative rank in the cumulative  
152 distribution of wealth position. All aforementioned analyses were performed using Stata (version  
153 15.0/MP, StataCorp).

154 A Bayesian linear regression model with a non-informative prior was developed, considering  
155 year as the covariate, to estimate the trends in indicators over time and its posterior predictive  
156 distribution. All proportions were logit transformed before the analysis, and all calculations were  
157 conducted as such. The Markov Chain Monte Carlo (MCMC) algorithm was applied to obtain  
158 1000 samples from the posterior distribution of the parameter of interest using two chains. For  
159 each of the chain, the first 5000 iterations were discarded as burn-ins and the number of  
160 iterations increased until the MCMC outputs converged. These posterior predictive distributions  
161 were used to obtain projections and credible intervals up to year 2030. They were also utilized to  
162 calculate the annual rate of change and the probability of achieving UHC targets for all included  
163 indicators. Another wealth quintile adjusted model with non-informative prior was fitted to  
164 estimate the predicted coverage of all indicators for different socio-economic groups.  
165 Convergence of MCMC outputs was assessed by visually examining trace plots. Posterior  
166 samples were considered to have converged when outputs from two chains adjoined.  
167 Additionally, Gelman-Rubin diagnostic statistics were applied as a quantifiable measure of  
168 convergence. A potential scale reduction factor (PSRF) was used in the Gelman diagnostic,  
169 where a PSRF value close to 1 signified convergence, and a PSRF value greater than 1.02  
170 indicated convergence failure. To further assess the accuracy of the model, a deviance  
171 information criterion (DIC) was calculated for each indicator at the wealth quintile and  
172 subnational level in the case that quintiles or regions also acted as covariates. For every single  
173 estimate of trend and projection in health service coverage, a DIC value was calculated for model  
174 with and without interaction. The model with smaller penalized deviance was integrated into the  
175 analysis (Table in S2 Table). Bayesian regression models were developed in JAGS and  
176 implemented in R.



## 177 Results

### 178 *Health service coverage*

179 Table 1 lists the predicted coverage of 17 chosen health service indicators, grouped into  
 180 prevention and treatment categories along with 95% credible intervals (CrI), the probability of  
 181 achieving the target of 80% coverage by the year 2030, as well as the annual rate of change from  
 182 1995 to 2030. The results are very promising amongst most prevention service indicators as they  
 183 are estimated to have more than 90% probability of achieving the target except need for family  
 184 planning satisfied, adequate sanitation, and non-use of tobacco. Amongst the treatment  
 185 indicators, care seeking for pneumonia among children is the least reassuring with a low  
 186 probability of 5.1% of reaching the target while access to institutional delivery and use of skilled  
 187 birth attendance will have more than 85% probability. In 2015, family planning demand satisfied  
 188 and care seeking for pneumonia were deemed to have the lowest national coverage at 46.3%  
 189 (95% CrI: 38.5-54.3) and 49.9% (95% CrI: 33.8-64.0), respectively, followed by insecticide  
 190 treated bed nets for pregnant women and children at around 60%.

**Table 1: National health service coverage with probability of achieving the target and rate of change, 1995-2030**

| Indicators                                | Predicted coverage in year (95% CrI) |                  |                  |                   | Probability <sup>a</sup> | Annual % change <sup>b</sup> |
|-------------------------------------------|--------------------------------------|------------------|------------------|-------------------|--------------------------|------------------------------|
|                                           | 1995                                 | 2005             | 2015             | 2030              |                          |                              |
| <b>Prevention indicators</b>              |                                      |                  |                  |                   |                          |                              |
| Needs for family planning satisfied       | 36.6 (30.5-42.7)                     | 41.4 (37.2-45.7) | 46.3 (38.5-54.3) | 53.7 (38.4-68.9)  | 0.9%                     | 1.1 (-0.2-2.3)               |
| At least four antenatal care visits       | 57.9 (49.6-63.5)                     | 73.7 (69.3-77.8) | 84.9 (78.3-89.4) | 93.9 (87.5-97.5)  | 99.9%                    | 1.4 (0.9-2.0)                |
| Postnatal care for mothers                | 0.4 (0.1-1.3)                        | 10.6 (5.6-17.6)  | 79.9 (61.7-91.3) | 99.8 (99.0-100.0) | 100%                     | 18.6 (13.5-23.9)             |
| Exclusive breastfeeding                   | 16.6 (9.6-25.2)                      | 40.7 (31.2-50.5) | 70.1 (52.3-83.2) | 92.6 (77.1-98.5)  | 96.3%                    | 5.3 (3.4-7.1)                |
| Insecticide treated bed nets for children | –                                    | 10.5 (5.9-17.0)  | 62.7 (42.7-80.4) | 98.1 (91.1-99.9)  | 99.5%                    | 10.4 (7.5-13.2)              |
| Insecticide treated bed nets for mothers  | –                                    | 6.7 (3.8-10.7)   | 56.7 (37.2-74.4) | 98.3 (91.8-99.9)  | 99.6%                    | 12.2 (9.2-15.1)              |

|                             |                  |                  |                  |                  |       |                 |
|-----------------------------|------------------|------------------|------------------|------------------|-------|-----------------|
| BCG immunization            | 84.9 (80.4-88.6) | 93.4 (92.1-94.7) | 97.2 (95.9-98.2) | 99.2 (98.4-99.7) | 100%  | 0.5 (0.3-0.7)   |
| DPT3 immunization           | 67.4 (59.9-75.0) | 82.1 (78.0-85.6) | 90.9 (86.3-94.3) | 96.8 (93.2-98.8) | 100%  | 1.1 (0.6-1.5)   |
| Polio3 immunization         | 67.9 (58.9-76.2) | 79.6 (75.1-83.9) | 87.6 (81.8-92.4) | 94.2 (87.3-98.0) | 100%  | 1.0 (0.5-1.5)   |
| Measles immunization        | 69.5 (60.6-77.9) | 83.8 (79.9-87.5) | 92.0 (87.5-95.1) | 97.3 (93.4-99.1) | 100%  | 1.0 (0.6-1.5)   |
| Improved water              | 60.9 (50.9-70.4) | 77.0 (71.7-82.0) | 87.6 (80.9-92.6) | 95.3 (88.7-98.5) | 100%  | 1.4 (0.7-2.0)   |
| Adequate Sanitation         | 24.6 (18.7-32.8) | 43.2 (37.8-49.4) | 64.1 (53.3-73.7) | 86.0 (72.4-94.1) | 88.4% | 3.8 (2.6-4.8)   |
| No-use of tobacco           | –                | 91.5 (87.6-94.4) | 91.1 (85.3-95.2) | 88.8 (62.9-98.3) | 87.5% | -0.1 (-1.0-0.6) |
| <b>Treatment indicators</b> |                  |                  |                  |                  |       |                 |
| Institutional delivery      | 40.3 (31.2-50.8) | 56.7 (49.6-63.2) | 71.5 (59.3-81.6) | 86.3 (69.9-95.1) | 86.2% | 2.3 (1.1-3.3)   |
| Skilled birth attendance    | 41.3 (31.6-52.0) | 57.5 (50.4-63.8) | 72.1 (61.0-81.4) | 86.6 (70.7-95.2) | 88.1% | 2.2 (1.2-3.2)   |
| Oral rehydration therapy    | 39.5 (27.8-51.6) | 55.6 (46.9-64.0) | 70.5 (55.8-82.1) | 85.2 (63.4-95.9) | 79.5% | 2.3 (0.8-3.5)   |
| Care seeking for pneumonia  | 35.9 (25.9-46.6) | 42.7 (34.6-50.2) | 49.9 (33.8-64.0) | 59.9 (30.1-83.6) | 5.1%  | 1.5 (-0.6-3.3)  |

Note: <sup>a</sup>The probability of meeting the target of 80% health service coverage by 2030 for the entire population, regardless of economic status, gender, or place of residence according to WHO's universal health coverage target. <sup>d</sup> The annual rate of change for the period 1995-2030. Trends and projections for all the year from 1993-2030 at the national level and across wealth quintiles for all indicators are shown in appendix (p13-21). CrI= credible interval; DPT3= three doses of DPT immunization; Polio3= three doses of polio immunization.

191 A notable achievement is that national coverage of the four childhood vaccinations (BCG,  
192 measles, three doses of DPT and polio vaccination) had already reached the target in 2015. In  
193 addition, coverage for maternal postnatal care increased from 10.6% (95%CrI: 5.6-17.6) in 2005  
194 to 79.9% (95% CrI: 61.7-91.3) in 2015. The lowest coverage among the poorest quintile was  
195 observed in adequate sanitation at 6.5% (95% CrI:3.4-11.1) in 2015. This is followed by need for  
196 family planning demand satisfied at 38.1% (95%CrI: 31.1-45.1) and access to skilled birth  
197 attendance at 38.9% (95% CrI: 25.3-53.7). All quintiles will fail to achieve the 80% coverage  
198 target for family planning demand satisfied and care seeking for pneumonia. Besides the two  
199 aforementioned indicators, the richest quintile is highly likely to reach the target for most  
200 indicators except polio vaccination and insecticide treated bed nets use by children under five. A  
201 detailed breakdown of coverage by wealth quintile for each indicator can be found in Tables in  
202 S3-S6 Table and Figures in S2-S10 Figure.

203 In order to provide a broader picture regarding the coverage of prevention and treatment  
204 services, the composite prevention and treatment indices (Figure 1 and 2) illustrate that overall  
205 national coverage of prevention and treatment services are expected to reach 92.2% (95% CrI:  
206 85.4-96.5) and 80.3% (95% CrI: 67.7-89.4) by 2030 and all quintiles other than the two poorest  
207 quintiles in treatment index will have high probabilities of achieving the 80% coverage target.  
208 Trends and projections in CCI related to reproductive, maternal and child health indicators  
209 between 1993 and 2030 states that overall national coverage will increase to 80.7% (95%CrI:  
210 77.3-83.9) by 2030 (Table in S7 Table and Figure in S1 Figure); however, only the middle class  
211 and the richer quintile are predicted to achieve the target. Detailed quintile-specific coverage of  
212 all three composite indices with probabilities of reaching the 80% coverage target by 2030 is  
213 presented in Table is S7 Table.

**Figure 1: Trends in and projections of overall prevention coverage in Ghana, 1993-2030**

**Figure 2: Trends in and projections of overall treatment coverage in Ghana, 1993-2030**

214 Figure 3 and 4 presents the trends and projections of prevention and treatment indices across the  
215 10 regions in Ghana from 1995 to 2030. All coverage are shown to have increased and are  
216 predicted to continue up to 2030. In 2015, the lowest overall prevention and treatment service  
217 coverage were observed in Northern at 71.5% (95%CrI: 67.7-75.2) and 43.9% (95%CrI: 33.2-  
218 55.1) respectively, while the highest overall coverage for prevention services was in Greater  
219 Accra at 88.5% (95%CrI: 86.5-90.2) and highest overall treatment coverage in Upper East at  
220 79.8% (95%CrI: 71.7-86.4). All regions are predicted to achieve the 80% coverage by 2030 with  
221 100% probabilities for composite prevention index; however, the same cannot be applied to  
222 composite treatment index as four out of the 10 regions will fail to reach the target, given  
223 probabilities less than 80% (Table in S9 Table).

**Figure 3: Trends and projections of overall prevention coverage across regions in Ghana, 1993-2030**

**Figure 4: Trends and projections of overall treatment coverage across regions in Ghana, 1993-2030**

224 *Inequality in service coverage*

225 Table 2 depicts the absolute difference or percentage point difference in the proportion of health  
226 service coverage between the extremes of wealth quintiles represented by SII values along with  
227 95% CrI. Overall, absolute inequalities have drastically decreased across most indicators except  
228 for use of skilled birth attendance, institutional delivery, and adequate sanitation in which SII  
229 only slightly decreased for skilled birth attendance and even increased and will remain so for  
230 institutional delivery and adequate sanitation. These three indicators have the biggest inequalities  
231 in 2015 and will prevail up to 2030. Adequate sanitation has a SII of 87.7 (95% CrI: 79.4-93.4),  
232 followed by institutional delivery at 87.4 (95% CrI: 77.9-93.6) and skilled birth attendance at  
233 69.9 (95% CrI: 56.6-81.1). These numbers signify that the richest quintile had 69.9 to 87.7  
234 percentage points higher coverage compared to the poor. Although inequalities in indicators  
235 related to maternal care such as antenatal and postnatal care have decreased, but persistent  
236 inequalities are predicted to exist up to 2030. Similar to absolute inequalities, decreasing trends  
237 are also predicted for relative inequalities, represented by RII values, to a lesser degree. By  
238 examining current values, it is evident that for most indicators, the richer groups had one to three  
239 times more coverage than their poorer counterparts in 2015. Detailed RIIs from 1995 to 2030 is  
240 presented in Table in S8 Table.

**Table 2: Slope index of inequality (SII) in health service indicators, 1995-2030**

| Indicators | SII (95% CrI) (Q5-Q1) <sup>a</sup> |
|------------|------------------------------------|
|------------|------------------------------------|

|                                                        | 1995             | 2005             | 2015             | 2030             |
|--------------------------------------------------------|------------------|------------------|------------------|------------------|
| <b>Prevention indicators</b>                           |                  |                  |                  |                  |
| Needs for family planning satisfied                    | 20.3 (14.6-27.0) | 13.3 (9.7-17.7)  | 8.8 (4.1-16.4)   | 5.0 (1.0-15.5)   |
| At least four antenatal care visits                    | 52.2 (45.4-59.5) | 40.5 (36.0-45.6) | 29.9 (23.1-38.3) | 17.8 (9.6-30.9)  |
| Postnatal care for mothers <sup>c</sup>                | –                | 75.9 (57.1-89.6) | 54.2 (35.8-70.2) | 25.6 (1.4-77.8)  |
| Exclusive breastfeeding                                | 61.5 (40.5-79.5) | 13.3 (8.7-18.9)  | 1.6 (0.4-4.4)    | 0.1 (0.0-0.5)    |
| Insecticide treated bed nets for children <sup>b</sup> | –                | –                | –                | –                |
| Insecticide treated bed nets for mothers <sup>b</sup>  | –                | –                | –                | –                |
| BCG immunization                                       | 28.0 (19.8-38.4) | 11.2 (8.4-14.7)  | 4.1 (2.1-7.3)    | 0.9 (0.2-2.6)    |
| DPT3 immunization                                      | 40.7 (30.4-52.2) | 14.3 (10.6-18.6) | 4.0 (2.1-6.9)    | 0.6 (0.1-1.6)    |
| Polio3 immunization                                    | 39.6 (28.6-51.3) | 9.0 (5.8-13.7)   | 1.6 (-0.5-4.0)   | 0.1 (0.0-0.6)    |
| Measles immunization                                   | 38.4 (29.8-48.2) | 15.8 (12.5-19.7) | 5.5 (3.2-8.6)    | 1.1 (0.3-2.7)    |
| Improved water                                         | 78.7 (71.6-85.8) | 57.4 (39.8-75.0) | 32.5 (16.9-48.1) | 10.5 (4.2-16.7)  |
| Adequate sanitation                                    | 71.0 (59.5-80.5) | 80.9 (79.4-93.4) | 87.7 (79.4-93.4) | 93.4 (81.4-98.4) |
| No-use of tobacco <sup>e</sup>                         | –                | 18.2 (4.4-31.9)  | 10.5 (2.0-18.9)  | 4.4 (0.7-8.2)    |
| <b>Treatment indicators</b>                            |                  |                  |                  |                  |
| Institutional delivery                                 | 70.9 (58.7-87.1) | 80.7 (73.9-85.9) | 87.4 (77.9-93.6) | 93.0 (79.0-98.5) |
| Skilled birth attendance                               | 72.5 (62.0-80.9) | 71.4 (64.4-77.5) | 69.9 (56.6-81.1) | 67.0 (40.6-87.7) |
| Oral rehydration therapy                               | 23.5 (17.8-29.6) | 15.3 (12.6-18.4) | 9.8 (6.4-14.5)   | 5.1 (1.9-11.0)   |
| Care seeking for pneumonia                             | 37.0 (26.5-47.8) | 26.9 (21.1-32.8) | 19.0 (11.4-29.0) | 11.3 (3.3-27.9)  |

Note: <sup>a</sup>SII= slope index of inequality; Q5 indicates the richest quintile, and Q1 indicates the poorest quintile. <sup>b</sup>unable to obtain accurate trends due to huge variations in SII values from raw data between survey years. <sup>c</sup>No data before year 2000. CrI= credible interval; DPT3= three doses of DPT immunization; Polio3= three doses of polio immunization.

## 241 *Financial hardship*

242 Both incidence of CHE and impoverishment drastically decreased from 1995 to 2030 with an  
 243 annual rate of reduction at 10.2% (95% CrI: 5.9-14.2) (Table 3). In 1995, 15.0% (95% CrI: 9.6-  
 244 22.6) of households suffered financial catastrophe as a result of OOP health care payments;  
 245 however, that proportion will reduce to 0.4% (95%CrI: 0.1-1.3) in 2030. The probability of  
 246 achieving 100% financial risk protection is estimated to be 96.2%. Proportion of households that  
 247 experienced impoverishment was 1.7% (95%CrI: 1.1-2.6) in 1995 and is predicted to reduce to

248 0.2% (95%CrI: 0.0-0.5) by 2030. Inequality in CHE also decreased from 1995 to 2030 as shown  
 249 in table 4. In 1995, the poorest quintile was suffering 5.4 percentage points more CHE in  
 250 comparison to the richest quintile. By 2030, that difference will reduce to 0.1 percentage point.

**Table 3: Trends and projections of the incidence of catastrophic health expenditure and impoverishment in Ghana, 1995-2030**

| Year                                  | Catastrophic health expenditure <sup>a</sup><br>(95% CrI) | Impoverishment<br>(95% CrI) | Financial hardship <sup>b</sup><br>(95% CrI) |
|---------------------------------------|-----------------------------------------------------------|-----------------------------|----------------------------------------------|
| 1995                                  | 15.0 (9.6-22.6)                                           | 1.7 (1.1-2.6)               | 15.5 (10.1-22.9)                             |
| 2000                                  | 9.0 (6.4-12.7)                                            | 1.2 (0.8-1.7)               | 9.7 (7.0-13.6)                               |
| 2005                                  | 5.4 (3.8-7.3)                                             | 0.9 (0.6-1.2)               | 5.9 (4.2-8.5)                                |
| 2010                                  | 3.2 (2.0-4.9)                                             | 0.6 (0.4-0.9)               | 3.6 (2.2-5.6)                                |
| 2015                                  | 1.9 (0.9-3.5)                                             | 0.4 (0.2-0.8)               | 2.2 (1.1-3.8)                                |
| 2020                                  | 1.1 (0.4-2.4)                                             | 0.3 (0.1-0.7)               | 1.3 (0.5-2.7)                                |
| 2030                                  | 0.4 (0.1-1.3)                                             | 0.2 (0.0-0.5)               | 0.5 (0.1-1.4)                                |
| Annual rate of reduction <sup>c</sup> | -10.2 (-14.2 to -5.9)                                     | -6.7 (-10.7 to -2.7)        | -9.7 (-13.6 to -6.0)                         |
| Probability <sup>d</sup>              | 96.2%                                                     | 100%                        | 99.7%                                        |

Note: <sup>a</sup>Catastrophic health expenditure was calculated based on the 25% threshold of nonfood consumption; <sup>b</sup>Financial hardship indicates the incidence of catastrophic health expenditures and/or impoverishment; <sup>c</sup>The annual rate of change for the period 1995-2030; <sup>d</sup>Probability= the probability of meeting the target of 100% financial risk protection by 2030 according to WHO's universal health coverage target; CrI= credible interval.

**Table 4: Inequality in catastrophic health expenditure in Ghana, 1995-2030**

| Year | Catastrophic health expenditure <sup>a</sup> (95% CrI) |                 | Inequality in catastrophic health expenditure |                     |
|------|--------------------------------------------------------|-----------------|-----------------------------------------------|---------------------|
|      | Poorest (Q1)                                           | Richest (Q5)    | RII (95% CrI)                                 | SII (95% CrI)       |
| 1995 | 16.4 (11.4-23.7)                                       | 11.7 (7.8-16.3) | 0.7 (0.6-0.8)                                 | -5.4 (-8.1 to -2.7) |
| 2000 | 10.0 (7.0-14.2)                                        | 7.0 (4.7-9.7)   | 0.7 (0.5-0.8)                                 | -3.5 (-5.2 to -1.8) |
| 2005 | 5.9 (4.0-8.4)                                          | 4.1 (2.7-5.7)   | 0.7 (0.5-0.8)                                 | -2.1 (-3.2 to -1.1) |
| 2010 | 3.4 (2.2-5.0)                                          | 2.4 (1.5-3.5)   | 0.7 (0.5-0.8)                                 | -1.3 (-1.9 to -0.6) |
| 2015 | 2.0 (1.2-3.0)                                          | 1.4 (0.8-2.1)   | 0.6 (0.5-0.8)                                 | -0.7 (-1.0 to -0.4) |
| 2020 | 1.1 (0.6-1.8)                                          | 0.8 (0.4-1.3)   | 0.6 (0.5-0.8)                                 | -0.4 (-0.6 to -0.2) |
| 2030 | 0.4 (0.2-0.7)                                          | 0.3 (0.1-0.5)   | 0.6 (0.5-0.8)                                 | -0.1 (-0.2 to -0.0) |

Probability 99.6% 99.7% – –

Note: CrI= credible interval; RII= relative index of inequality; SII= slope index of inequality; <sup>a</sup>Catastrophic health expenditure was calculated based on a 25% threshold of nonfood expenditure.

251 At the subnational level as represented in table 5, proportion of households suffering CHE  
 252 displays a decreasing trend and all regions are estimated to have extremely low incidence by  
 253 2030 with remarkably high probabilities of achieving 100% financial risk protection. In 2015,  
 254 Central region incurred the highest incidence at 2.3% (95% CrI: 1.4-3.5), followed by Volta at  
 255 2.1% (95%CrI: 1.3-3.2). At the same time, Brong-Ahafo and Upper East had the highest  
 256 incidence of impoverishment at 0.8%. Details regarding the incidence of impoverishment for all  
 257 regions can be found in Table in S10 Table.

**Table 5: Incidence of catastrophic health expenditure at the subnational level in Ghana, 1995-2030**

| Region        | Catastrophic health expenditure <sup>a</sup> (95% CrI) |               |               |               | Probability <sup>b</sup> |
|---------------|--------------------------------------------------------|---------------|---------------|---------------|--------------------------|
|               | 1995                                                   | 2005          | 2015          | 2030          |                          |
| Ashanti       | 16.1 (10.5-22.5)                                       | 5.9 (3.8-8.6) | 2.0 (1.2-3.1) | 0.4 (0.2-0.7) | 99.5%                    |
| Brong-Ahafo   | 14.6 (9.5-20.3)                                        | 5.3 (3.4-7.6) | 1.8 (1.1-2.8) | 0.4 (0.2-0.6) | 100%                     |
| Central       | 17.9 (11.9-24.7)                                       | 6.7 (4.3-9.5) | 2.3 (1.4-3.5) | 0.5 (0.2-0.8) | 99.7%                    |
| Eastern       | 15.0 (10.2-21.2)                                       | 5.5 (3.6-7.9) | 1.9 (1.1-2.9) | 0.4 (0.2-0.7) | 99.9%                    |
| Greater Accra | 9.5 (6.2-13.7)                                         | 3.3 (2.2-4.9) | 1.1 (0.7-1.7) | 0.2 (0.1-0.4) | 100%                     |
| Northern      | 13.0 (8.6-18.5)                                        | 4.7 (3.0-6.8) | 1.6 (1.0-2.5) | 0.3 (0.2-0.6) | 100%                     |
| Upper East    | 9.1 (5.9-13.4)                                         | 3.2 (2.1-4.7) | 1.1 (0.6-1.7) | 0.2 (0.1-0.4) | 100%                     |
| Upper West    | 8.4 (5.3-12.5)                                         | 2.9 (1.8-4.4) | 1.0 (0.6-1.5) | 0.2 (0.1-0.3) | 100%                     |
| Volta         | 16.3 (11.2-22.9)                                       | 6.0 (4.0-8.7) | 2.1 (1.3-3.2) | 0.4 (0.2-0.7) | 99.6%                    |
| Western       | 13.8 (9.1-19.9)                                        | 5.0 (3.2-7.2) | 1.7 (1.0-2.7) | 0.3 (0.2-0.6) | 99.9%                    |

Note: <sup>a</sup>Catastrophic health expenditure was calculated based on 25% threshold of nonfood expenditure; <sup>b</sup>The probability of achieving 100% financial risk protection; CrI: credible interval

## 258 Discussion

259 This paper provides a comprehensive picture of Ghana's progress towards UHC, as it extensively  
260 examined both health service coverage and financial risk protection components at the national,  
261 subnational, and wealth quintile levels. There have been tremendous improvements in increasing  
262 access to various health services with upward trends in coverage accompanied by decreasing  
263 trends in the proportion of households suffering CHE. Even though Ghana implemented the  
264 NHIS in 2003 as an attempt to remove barriers to cost and increase health service utilization  
265 especially among the poor [16], inequalities still exist for both UHC components throughout the  
266 nation. Similarly, subnational disparities were apparent as well with some regions faring better  
267 than others.

268 Findings from the analyses indicate that most of the maternal health indicators such as more than  
269 four antenatal care visits, postnatal care for mothers, institutional delivery, and use of skilled  
270 birth attendance have already reached the 80% target in 2015 at the national level, most likely  
271 due to the implementation of NHIS as this insurance allows pregnant women to be exempt from  
272 premium with maternity care coverage [17]. In addition, following enrollment into NHIS, the  
273 Maternal Health Program, granted to women upon confirmation of pregnancy, completely  
274 eliminates OOP payments for six antenatal care visits, delivery care, two postnatal care visits,  
275 and infant care up to three months of age [17]. This could be a reason why postnatal care for  
276 mothers increased by eight-fold in the span of 10 years from 2005 to 2015 and high coverage of  
277 childhood vaccinations. Countries such as Rwanda and Indonesia have also proved that pregnant  
278 women who are enrolled into insurance are more likely to utilize various maternal care services  
279 such as prenatal care, institutional delivery, skilled birth attendants, postnatal care, and seek  
280 vaccinations for their children [16-18]. Therefore, continuous efforts must be made to encourage  
281 pregnant women to enroll into NHIS and to utilize maternal care services.



282 At the national level, family planning demand satisfied showed the least likelihood of reaching  
283 its target and the reason could be attributed to the fact that this service is not covered under NHIS  
284 but implemented through a government vertical program [19] and this pattern is consistent with a  
285 previous study [20]. The low uptake of family planning can be explained by many facets such as  
286 misconception, stigma, lack of knowledge, religious abhorrence, spousal disapproval, and  
287 inaccessibility [21]. To increase the uptake of family planning, national efforts to include it as a  
288 component of the maternal health care package under the NHIS, and education and involvement  
289 of male partners should be considered. Community health workers (CHWs) can greatly improve  
290 access to contraceptives and provide education on their correct use [22].

291 Similarly, care seeking for the treatment of pneumonia also had a low coverage and unlikely to  
292 reach the target because a past study conducted in rural Ghana found significant knowledge  
293 deficit among residents regarding pneumonia [23]. In that study, only one-third of the studied  
294 population ever heard of the disease name and among those, only half sought treatment for their  
295 children [23]. It is imperative to increase people's knowledge of childhood illnesses and perhaps  
296 the Ministry of Health and Ghana Health Service need to strengthen the health promotion unit to  
297 provide structured and targeted community educational programs. Enrolling into NHIS can  
298 potentially improve treatment-seeking behavior since parents who are enrolled are more likely to  
299 seek curative and preventive care for their children [24].

300 We also found that utilization of institutional delivery and access to skilled birth attendance were  
301 among the top three indicators with the biggest absolute and relative inequalities in 2015. Several  
302 studies have found that wealthier and more educated women are more likely to enroll into NHIS  
303 and seek maternal care services [17-19]. Many women from poor households lack the basic  
304 knowledge about insurance system such as not being aware of the fact that their children and

305 maternal health services are exempt from insurance premium; some simply did not know how to  
306 register themselves or their children [17]. This further highlight the need for more community  
307 based education on the NHIS targeting especially women from poorer households to enroll.  
308 Community health workers (CHWs) have proven to be effective in improving health care access  
309 and overall health status [25,26]; therefore, they can also be used to educate and encourage  
310 enrolment of caregivers and mothers onto the NHIS. These health workers can act as channels in  
311 reaching out to the poor women and educate them on the benefits package for maternal health  
312 under the NHIS and encourage them to enroll.

313 The study found wealth quintile based differences in coverage among most health service  
314 indicators, which indicated that enrollment into insurance maybe concentrated among the rich.  
315 This observation is consistent with findings in previous studies [18,27,28]. Furthermore, a study  
316 done in rural Ghana found that enrollment into NHIS is 2.5 times more among the rich than the  
317 poor [29]. This deviates from NHIS' original equity goal, which was to increase affordability and  
318 utilization of health services especially among the poor and vulnerable population [19]. If the  
319 poor are not insured, there is an increased likelihood of illnesses resulting in worse health status  
320 and further impoverishment. This will not only widen inequality gap but also drifts away from  
321 UHC goals. In addition to quintile-based differences, inequality also prevailed at the subnational  
322 level with Northern region lagging significantly behind all other regions in prevention and  
323 treatment coverage. This could be explained by the fact that this region occupies about a third of  
324 the land-size of Ghana, and has the lowest doctor-to-population and nurse-to-population ratios,  
325 making health services more difficult to obtain [17]. Furthermore, this region is the biggest  
326 contributor to poverty in Ghana [30]. Overall, regional specific strategies (administrative and  
327 social policy) will be needed. Some policy measures such as budgeting of CHWs, and promoting

328 current partnership with One Million CHW Campaign [25] will be keys. Wealth, education,  
329 employment, and location play critical roles in health service coverage, thus national and sub-  
330 national efforts are needed to increase all aspects in order to improve coverage [31].

331 Financial catastrophe decreased by almost eight-fold from 1995 to 2015, proving that NHIS have  
332 aided in reducing OOP health payments across the nation. During the same period,  
333 impoverishment witnessed a four-fold decrease. Although inequality gaps have narrowed as  
334 difference in the incidence of financial catastrophe between rich and poor groups reduced, the  
335 poor is still suffering more CHE as a result of OOP payment. This finding is in congruence with  
336 previous studies from other Sub-Saharan African countries [32-34]. Moreover, benefits received  
337 from health care services are also unequal among those paying for it. In Ghana, benefits from the  
338 public sector and private services tend to be pro-rich despite more health care needs by the poor  
339 [33]. A study found that 23% of those indicated having poor health in the poorest quintile only  
340 received less than 13% of total health care benefits compared to 16% of those in the richest  
341 quintile obtaining over 24% benefits [6]. At a threshold of 25% non-food expenditure, incidence  
342 of CHE was 1.8% in 2015 and 0.4% of households were pushed into poverty. These results were  
343 still worse compared to earlier studies done in South Africa and Tanzania in which  
344 impoverishment were only 0.045% and 0.37%, respectively in 2008 [33]. On a positive note,  
345 Ghana's progress was shown to be better than Rwanda and Nigeria [34-36].

346 From these results, it is evident that NHIS has contributed to Ghana moving one step closer to  
347 realizing UHC with great improvement seen in both components of the UHC. However,  
348 persistent inequalities between rich and poor were apparent at all levels in health service  
349 coverage and financial risk protection. Insurance premiums and registration fees remain as  
350 obstacles to enrolment for the poor, many are simply left unattended without any form of

351 protection [27]. For people in the poorest quintile, premium imposes a heavy burden as it takes  
352 up 11.4% of their non-food expenditure while it only takes up 5.9% for general households [28].  
353 A recent study done in Ghana revealed that as share of OOP payment for healthcare in total  
354 household expenditure increases, impoverishment deepens [37]. Reducing OOP payment for  
355 healthcare, especially for the poor, is essential as it is a determining factor of impoverishment.  
356 UHC policy has proven to greatly contributes to the reduction of catastrophic payments [38].

357 Regardless of NHIS' shortcomings, it is still considered an accomplishment for Ghana, making  
358 the country one of the few in Sub-Saharan Africa to implement a nationwide insurance scheme.  
359 Previous studies conducted in Ghana regarding the protective effect of NHIS revealed that  
360 incidence and intensity of CHE were greatly reduced in insured individuals especially for the  
361 poor [29,39]. It proved to have protective mechanism against financial shocks with a 67%  
362 reduction in OOP and reduces the likelihood of foregoing other subsistent needs for health care  
363 [29]. It is recommended that Ghana to continue with its current progress by further enrolling all  
364 citizens into the scheme. There is a need to explore other funding options to ensure sustainability  
365 of NHIS as well as to further lower premium for the poor and vulnerable population. Thailand  
366 sets a great example in establishing equity through its insurance scheme by subsidizing tax for  
367 the poor instead of premium contribution [40]. It is believed that free health care for all is  
368 achievable and affordable in Ghana via cost savings, progressive taxation, and high quality  
369 transparent aid [41].

### 370 **Strengths and limitations**

371 One of the major strengths of this study is that it comprehensively examined both health service  
372 coverage and financial risk protection. It also provided trends and future projections for chosen

373 indicators. Furthermore, subnational analysis yielded further detailed assessment. Few  
374 accompanied limitations include missing information prior to 2000 for some of the indicators,  
375 the inability to make projections for NCD and HIV related indicators, and the inability to capture  
376 information for those that are too poor to utilize healthcare.

## 377 **Conclusion**

378 Ghana with its strenuous efforts in making health care more equitable and affordable has made  
379 tremendous improvements in health service coverage along with reducing out-of-pocket (OOP)  
380 payment owing to the enforcement of NHIS. The establishment of NHIS was also an attempt to  
381 achieve MDGs, especially in the area of maternal and child health in which significant  
382 improvements were observed. However, apparent inequalities were evident at the national and  
383 subnational level since the poor were suffering more catastrophic health expenditure (CHE) and  
384 had less access to health services. These inequalities were observed in many studies conducted in  
385 Ghana thus far. Policy makers need to have stronger commitments in achieving equity as many  
386 health care interventions, aimed at the poor, do not reach them. Several options to be considered  
387 are equitably distribute funds to regions according to needs, reduce copayment by exempting or  
388 heavily subsidizing premium for the poor, and enhance Community-based Health Planning and  
389 Service programme to improve access to hard-to-reach population. Ghana serves as an  
390 exemplary example for other Sub-Saharan African countries in implementing a health insurance  
391 at the national level. Its achievement in improving health care utilization for its citizens and  
392 reducing financial burdens is praiseworthy. It is recommended that Ghana to continue with its  
393 current progress by further enrolling all its citizens into the scheme. By doing so, UHC will no  
394 longer be a distant dream.

## 395 References

- 396 1 World Health Organization. Tracking universal health coverage: first global monitoring  
397 report. Geneva: World Health Organization, 2015.
- 398 2 Boerma JT, Eozenou P, Evans D, Evans T, Kieny M-P, Wagstaff A. Monitoring progress  
399 towards universal health coverage at country and global levels. *PLoS Med* 2014; 11:  
400 e1001728.
- 401 3 UN General Assembly. Transforming our world: the 2030 Agenda for Sustainable  
402 Development. New York: United Nations, 2015.
- 403 4 World Bank. Universal Health Coverage (UHC) in Africa: a framework for action.  
404 Washington, DC: World Bank Group, 2016.
- 405 5 Carapinha JL, Ross-Degnan D, Desta AT, Wagner AK. Health insurance systems in five  
406 Sub-Saharan African countries: medicine benefits and data for decision making. *Health*  
407 *Policy* 2011; 99: 193–202.
- 408 6 Akazili J, Garshong B, Aikins M, Gyapong J, McIntyre D. Progressivity of health care  
409 financing and incidence of service benefits in Ghana. *Health Policy Plan* 2012; 27:13-22.
- 410 7 Alhassan RK, Nketiah-Amponsah E, Arhinful DK. A review of the national health  
411 insurance scheme in Ghana: what are the sustainability threats and prospects? *PLoS One*  
412 2016; 11: 1–16.
- 413 8 Amporfu E. Equity of the premium of the Ghanaian National Health Insurance Scheme  
414 and the implications for achieving universal coverage. *Int J Equity Health* 2013; 12: 4.
- 415 9 Aryeetey GC, Westeneng J, Spaan E, Jehu-Appiah C, Agyepong IA, Baltussen R. Can  
416 health insurance protect against out-of-pocket and catastrophic expenditures and also  
417 support poverty reduction? Evidence from Ghana's National Health Insurance Scheme.  
418 *Int J Equity Health* 2016; 15: 116.
- 419 10 World Bank. Data Bank: World Development Indicators.  
420 <http://databank.worldbank.org/data/reports.aspx?source=world-development-indicators>.  
421 Accessed November 2, 2017.
- 422 11 Barros AJ, Victora CG. Measuring coverage in MNCH: determining and interpreting  
423 inequalities in coverage of maternal, newborn, and child health interventions. *PLoS Med*  
424 2013; 10(5): e1001390.
- 425 12 Boerma JT, Bryce J, Kinfa Y, Axelson H, Victora CG. Mind the gap: equity and trends in  
426 coverage of maternal, newborn, and child health services in 54 countdown countries.  
427 *Lancet* 2008; 371: 1259–67.
- 428 13 Deaton A, Zaidi S. Guidelines for constructing consumption wggregates for welfare  
429 analysis. Living Standards Measurement Study Working Paper No 135. Washington, DC:  
430 World Bank, 2002.
- 431 14 Xu K. Distribution of health payments and catastrophic expenditures methodology.  
432 Geneva: World Health Organization, 2005.
- 433 15 Nyaga VN, Arbyn M, Aerts M. Metaprop: a Stata command to perform meta-analysis of  
434 binomial data. *Arch Public Heal* 2014; 72: 39.
- 435 16 Blanchet NJ, Fink G, Osei-Akoto I. The effect of Ghana's National Health Insurance  
436 Scheme on health care utilization. *Ghana Med J* 2012; 46(2): 9.
- 437 17 Singh K, Osei-Akoto I, Otchere F, *et al.* Ghana's National Health insurance scheme and  
438 maternal and child health: a mixed methods study. *BMC Health Serv Res* 2015; 15: 108.

- 439 18 Wang W, Temsah G, Mallick L. The impact of health insurance on maternal health care  
440 utilization: evidence from Ghana, Indonesia and Rwanda. *Health Policy Plan* 2017;  
441 32(3): 366-375.
- 442 19 Bonfrer I, Breebaart L, Van de Poel E. The effects of Ghana's National Health Insurance  
443 Scheme on maternal and infant health care utilization. *PLoS One* 2016;  
444 11(11):e0165623.
- 445 20 Nyonator F, Ofosu A, Segbafah M, d'Almeida S. Monitoring and evaluating progress  
446 towards Universal Health Coverage in Ghana. *PLoS Med* 2014; 11(9): e1001691.
- 447 21 Enuameh YA, Okawa S, Asante KP, Kikuchi K, Mahama E, Ansah E, et al. Factors  
448 influencing health facility delivery in predominantly rural communities across the three  
449 ecological zones in Ghana: a cross-sectional study. *PLoS One* 2016; 11(3):e0152235.
- 450 22 Foreit J, Raifman S. Increasing access to family planning and reproductive health services  
451 through task-sharing between community health workers and community mid-level  
452 professionals in large-scale public-sector programs: a literature review to help guide case  
453 studies. 2011; 1–31.
- 454 23 Abbey M, Chinbuah MA, Gyapong M, Bartholomew LK, van den Borne B. Community  
455 perceptions and practices of treatment seeking for childhood pneumonia: a mixed  
456 methods study in a rural district, Ghana. *BMC Public Health* 2016; 16: 848.
- 457 24 Gajate-Garrido G, Owusua R. The National Health Insurance Scheme in Ghana:  
458 implementation challenges and proposed solutions. International Food Policy Research  
459 Institute, 2013.
- 460 25 Baatiema L, Sumah AM, Tang PN, Ganle JK. Community health workers in Ghana: the  
461 need for greater policy attention. *BMJ Glob Heal* 2016; 1: e000141.
- 462 26 Yeji F, Shibanuma A, Oduro A, et al. Continuum of care in a maternal, newborn and  
463 child health program in Ghana: low completion rate and multiple obstacle factors. *PLoS*  
464 *One* 2015; 10: 1–23.
- 465 27 Jehu-Appiah C, Aryeetey G, Spaan E, de Hoop T, Agyepong I, Baltussen R. Equity  
466 aspects of the National Health Insurance Scheme in Ghana: Who is enrolling, who is not  
467 and why? *Soc Sci Med* 2011; 72: 157–65.
- 468 28 Kusi A, Enemark U, Hansen KS, Asante FA. Refusal to enrol in Ghana's National Health  
469 Insurance Scheme: is affordability the problem? *Int J Equity Health* 2015; 14: 2.
- 470 29 Nguyen HTH, Rajkotia Y, Wang H. The financial protection effect of Ghana National  
471 Health Insurance Scheme: evidence from a study in two rural districts. *Int J Equity*  
472 *Health* 2011; 10: 4.
- 473 30 Ghana Statistical Services, Ghana Health Service, ICF International. Ghana Demographic  
474 and Health Survey 2014. Rockville, Maryland, 2015.
- 475 31 Onarheim KH, Tadesse M, Norheim OF, Abdullah M, Miljeteig I. Towards universal  
476 health coverage for reproductive health services in Ethiopia: two policy  
477 recommendations. *Int J Equity Health* 2015; 14: 86.
- 478 32 Akazili J, McIntyre D, Kanmiki EW, et al. Assessing the catastrophic effects of out-of-  
479 pocket healthcare payments prior to the uptake of a nationwide health insurance scheme  
480 in Ghana. *Glob Health Action* 2017; 10.
- 481 33 Mills A, Ataguba JE, Akazili J, et al. Equity in financing and use of health care in Ghana,  
482 South Africa, and Tanzania: Implications for paths to universal coverage. *Lancet* 2012;  
483 380: 126–33.
- 484 34 Onwujekwe O, Hanson K, Uzochukwu B. Examining inequities in incidence of



- 485 catastrophic health expenditures on different healthcare services and health facilities in  
486 Nigeria. *PLoS One* 2012; 7: 1–6.
- 487 35 Lu C, Chin B, Lewandowski JL, *et al.* Towards universal health coverage: an evaluation  
488 of Rwanda Mutuelles in its first eight years. *PLoS One* 2012; 7.
- 489 36 Onoka CA, Onwujekwe OE, Hanson K, Uzochukwu BS. Examining catastrophic health  
490 expenditures at variable thresholds using household consumption expenditure diaries.  
491 *Trop Med Int Heal* 2011; 16: 1334–41.
- 492 37 Akazili J, McIntyre D, Kanmiki EW, *et al.* Assessing the impoverishment effects of out-  
493 of-pocket healthcare payments prior to the uptake of a nationwide health insurance  
494 scheme in Ghana. *Glob Health Action* 2017; 10: 1–8.
- 495 38 Somkotra T, Lagrada LP. Payments for health care and its effect on catastrophe and  
496 impoverishment: Experience from the transition to Universal Coverage in Thailand. *Soc*  
497 *Sci Med* 2008; 67: 2027–35.
- 498 39 Kusi A, Hansen KS, Asante FA, Enemark U. Does the National Health Insurance Scheme  
499 provide financial protection to households in Ghana? *BMC Health Serv Res* 2015; 15:  
500 331.
- 501 40 Prakongsai P, Limwattananon S. The equity impact of the universal coverage policy:  
502 lessons from Thailand. 2009; 21.
- 503 41 Apoya P, Marriott A. Achieving a shared goal: free universal health care in Ghana.  
504 Oxford, U.K: Oxfam International, 2011



- 505 **Supporting information**
- 506 **S1 Table: Health service indicators**
- 507 **S2 Table: Deviance information criteria for health service indicators**
- 508 **S3 Table: Quintile-specific coverage of reproductive, maternal, and child health services in**
- 509 **Ghana, 1995-2030**
- 510 **S4 Table: Quintile-specific vaccination coverage in Ghana, 1995-2030**
- 511 **S5 Table: Quintile specific coverage of disease prevention and environmental health**
- 512 **indicators in Ghana, 1995-2030**
- 513 **S6 Table: Quintile specific coverage of treatment services for delivery care and childhood**
- 514 **illnesses in Ghana, 1995-2030**
- 515 **S7 Table: Quintile-specific coverage of composite indices for health services in Ghana,**
- 516 **1995-2030**
- 517 **S8 Table: Relative index of inequalities (RII) in health service indicators, 1995-2030**
- 518 **S9 Table: Overall prevention and treatment service coverage at the subnational level in**
- 519 **Ghana, 1995-2030**
- 520 **S10 Table: Impoverishment at the subnational level in Ghana, 1995-2030**
- 521 **S11 Table: Survey characteristics**
- 522 **S1 Figure: Trends and projections of composite coverage index in Ghana, 1993-2030**

- 523 **S2 Figure: Trends and projections of the coverage of insecticide treated bed nets for**  
524 **children under five and pregnant women in Ghana, 2003-2030**
- 525 **S3 Figure: Trends and projections of the coverage of antenatal and postnatal care for**  
526 **women in Ghana, 1993-2030**
- 527 **S4 Figure: Trends and projections of the coverage of family planning needs satisfied and**  
528 **exclusive breastfeeding in Ghana, 1993-2030**
- 529 **S5 Figure: Trends and projections of the coverage of delivery care services in Ghana,**  
530 **1993-2030**
- 531 **S6 Figure: Trends and projections of the coverage of measles and polio vaccination in**  
532 **Ghana, 1993-2030**
- 533 **S7 Figure: Trends and projections of the coverage of BCG and DPT vaccination in Ghana,**  
534 **1993-2030**
- 535 **S8 Figure: Trends and projections of the coverage of treatment services for childhood**  
536 **illnesses in Ghana, 1993-2030**
- 537 **S9 Figure: Trends and projections of the coverage of environmental health indicators in**  
538 **Ghana, 1993-2030**
- 539 **S10 Figure: Trends and projections of non-tobacco users in Ghana, 2003-2030**

## B. Composite treatment index

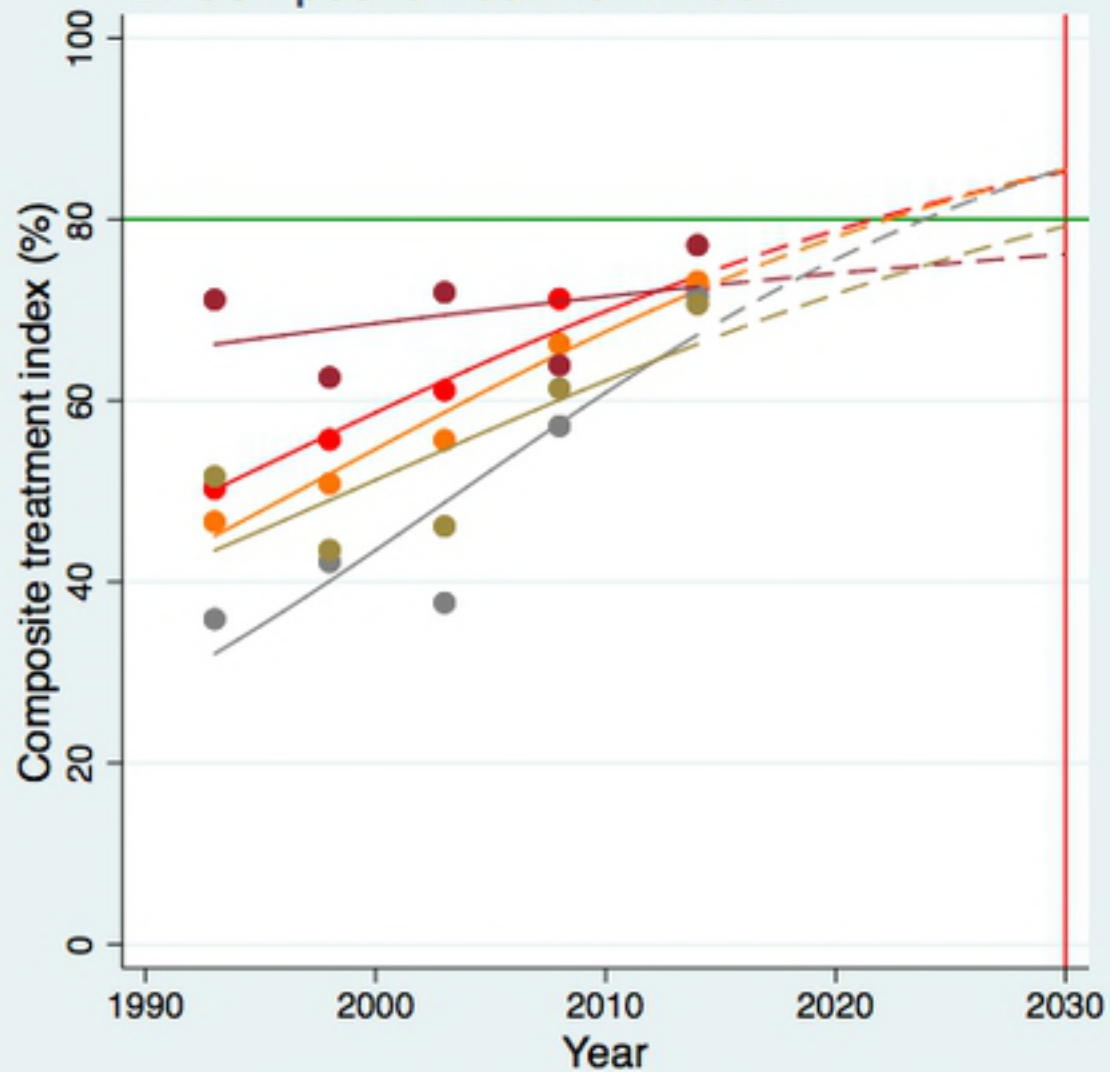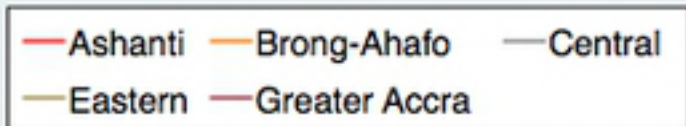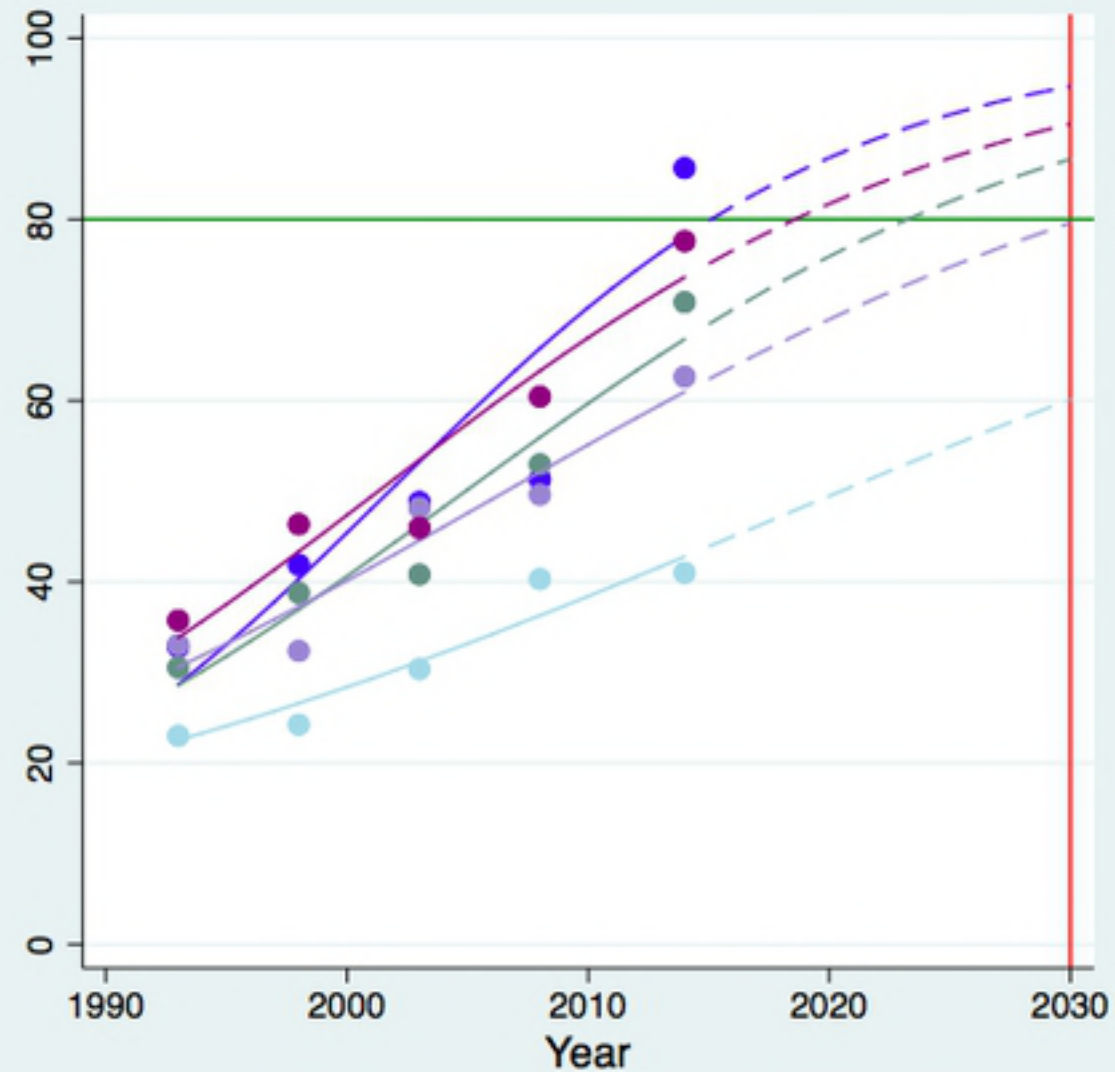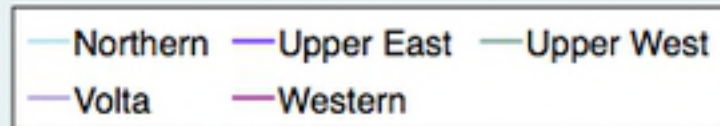

### A. Composite prevention index

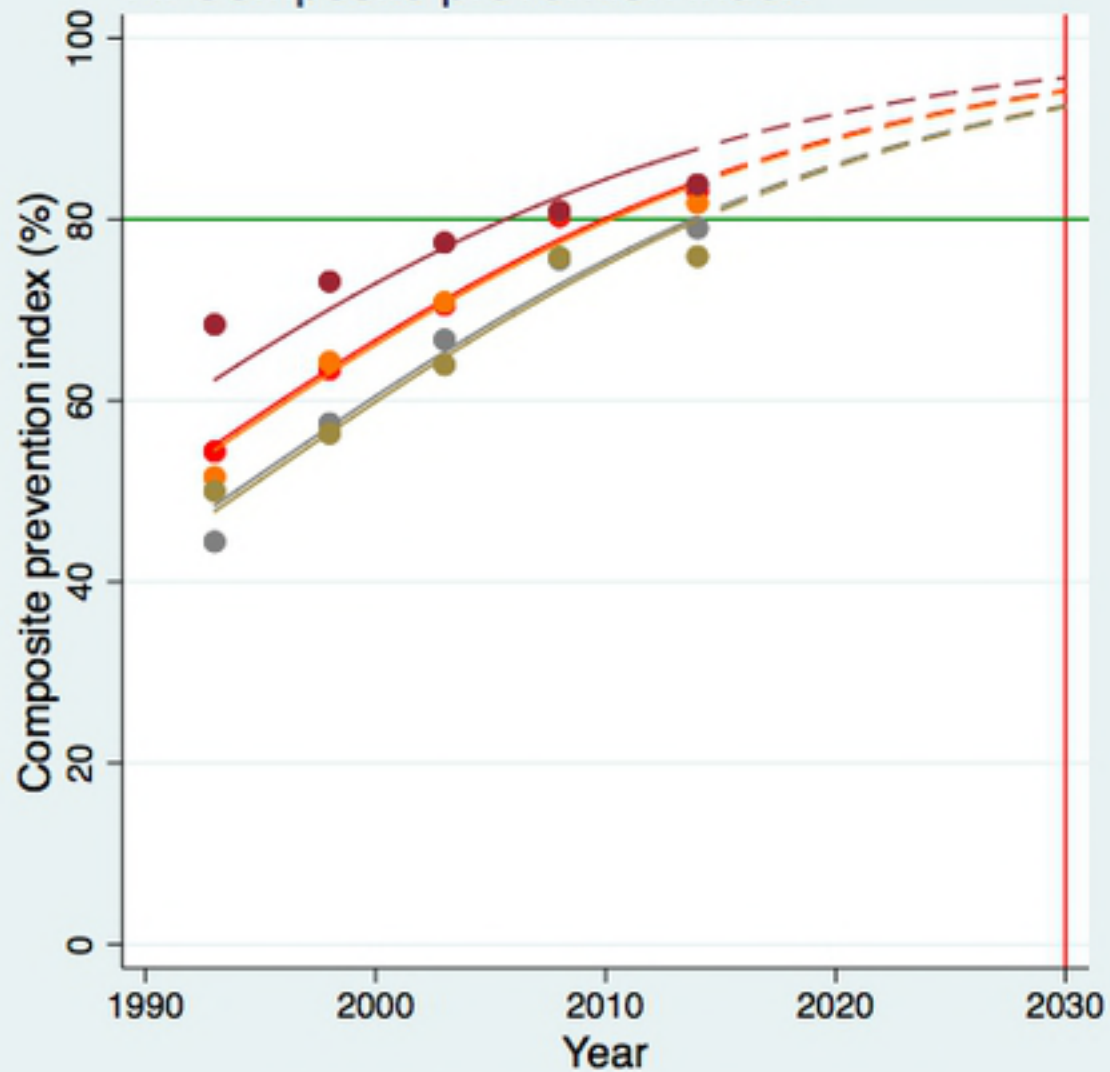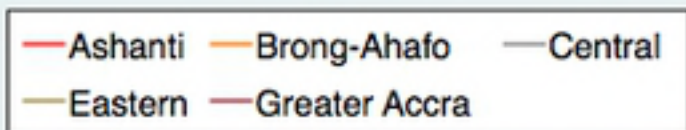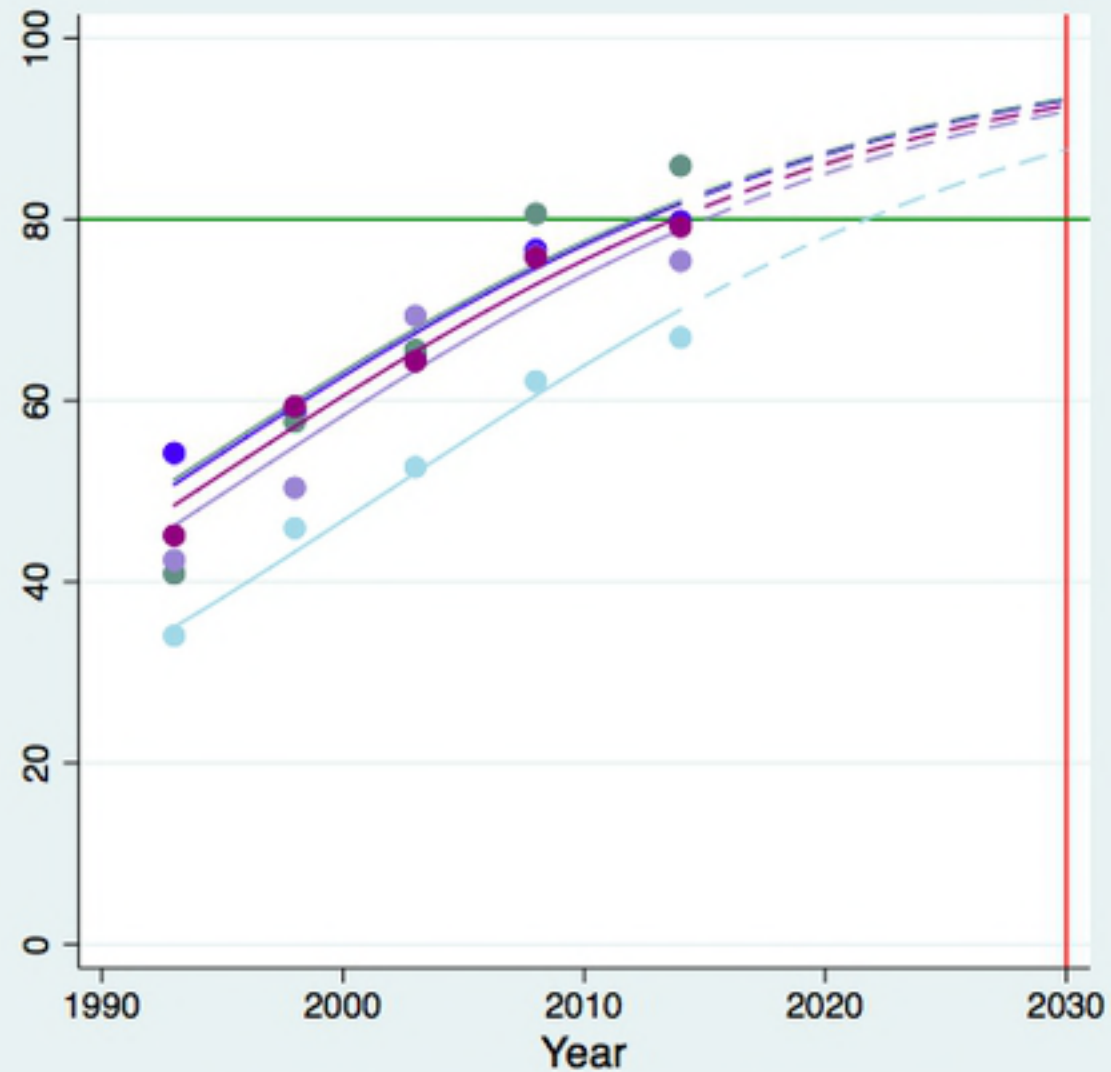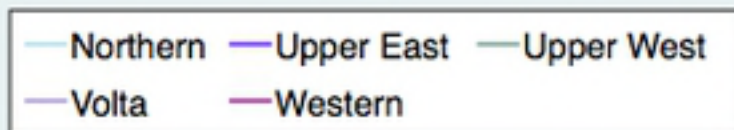

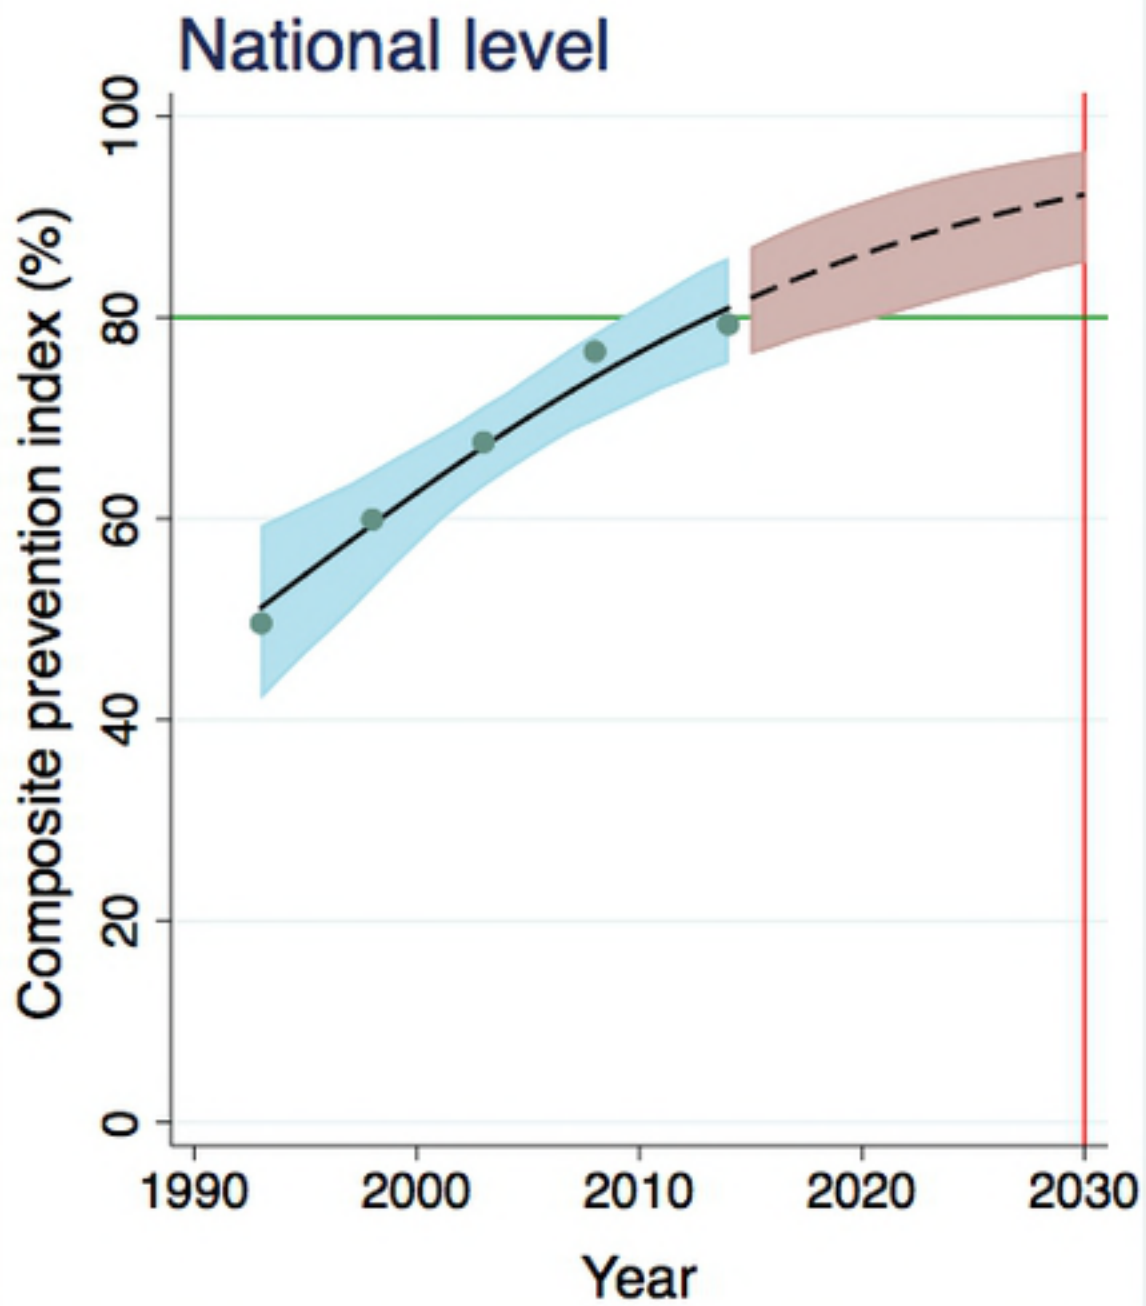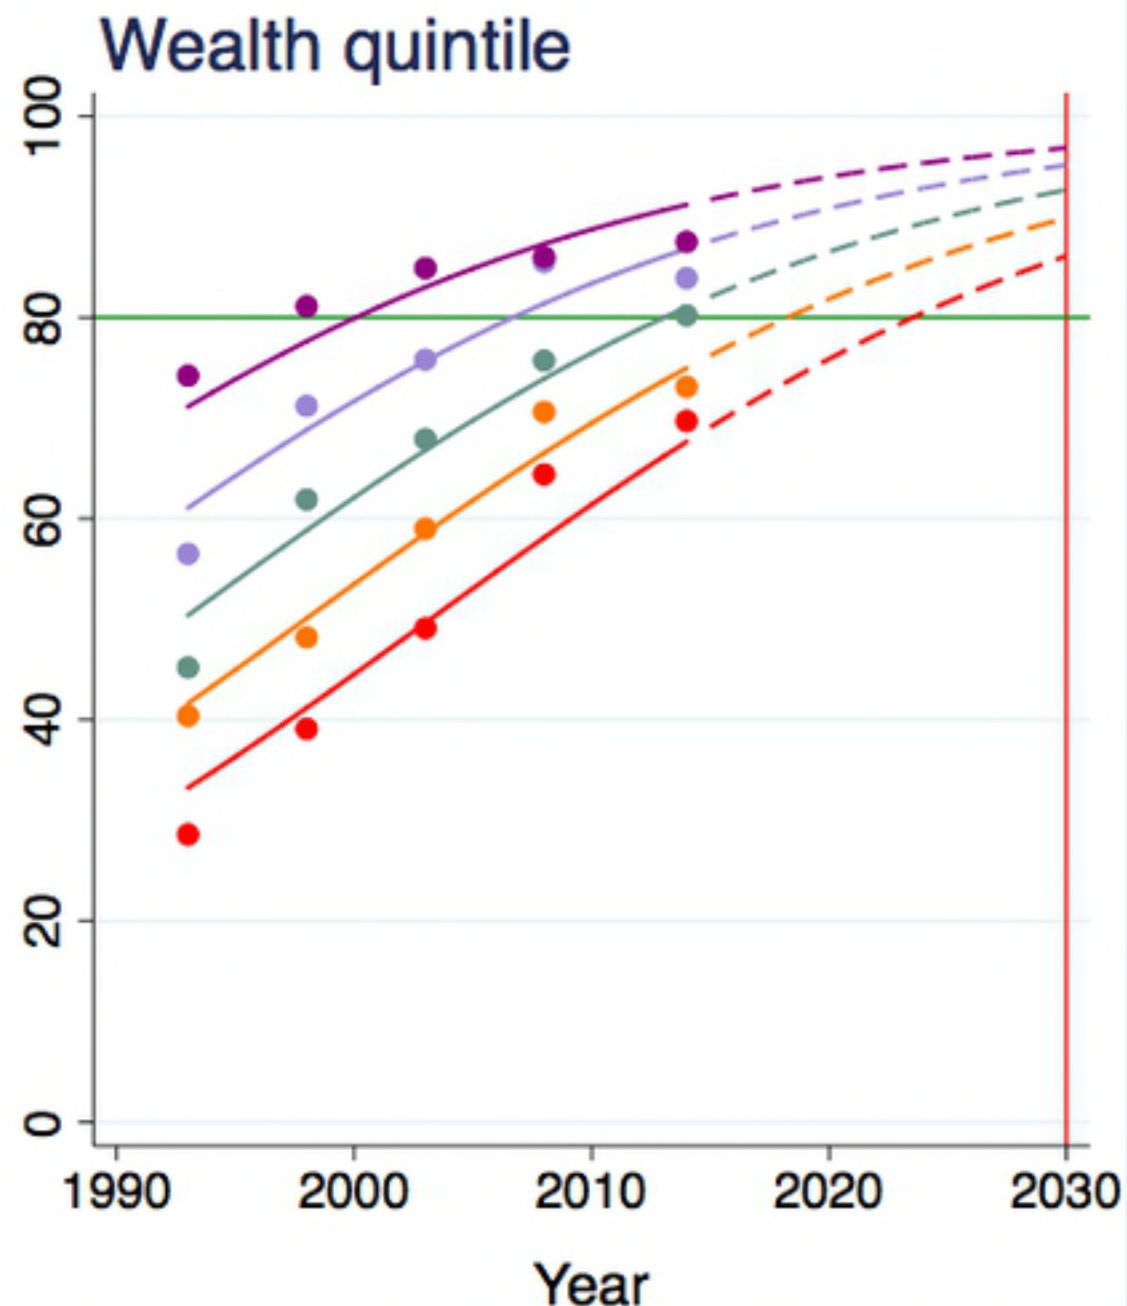

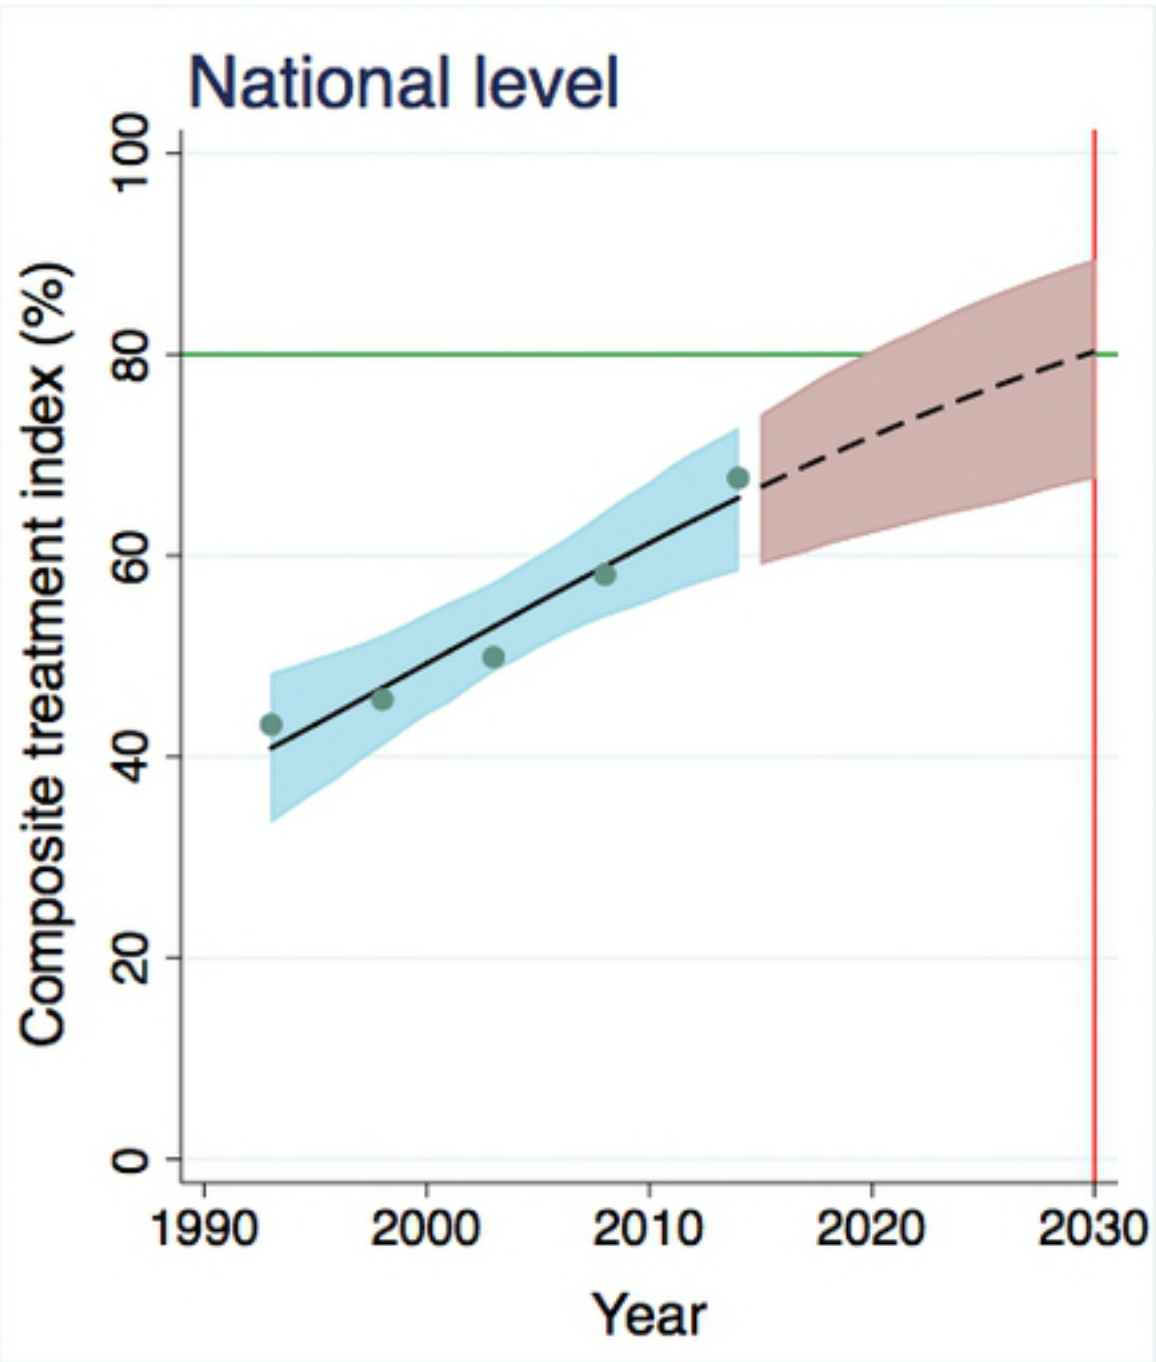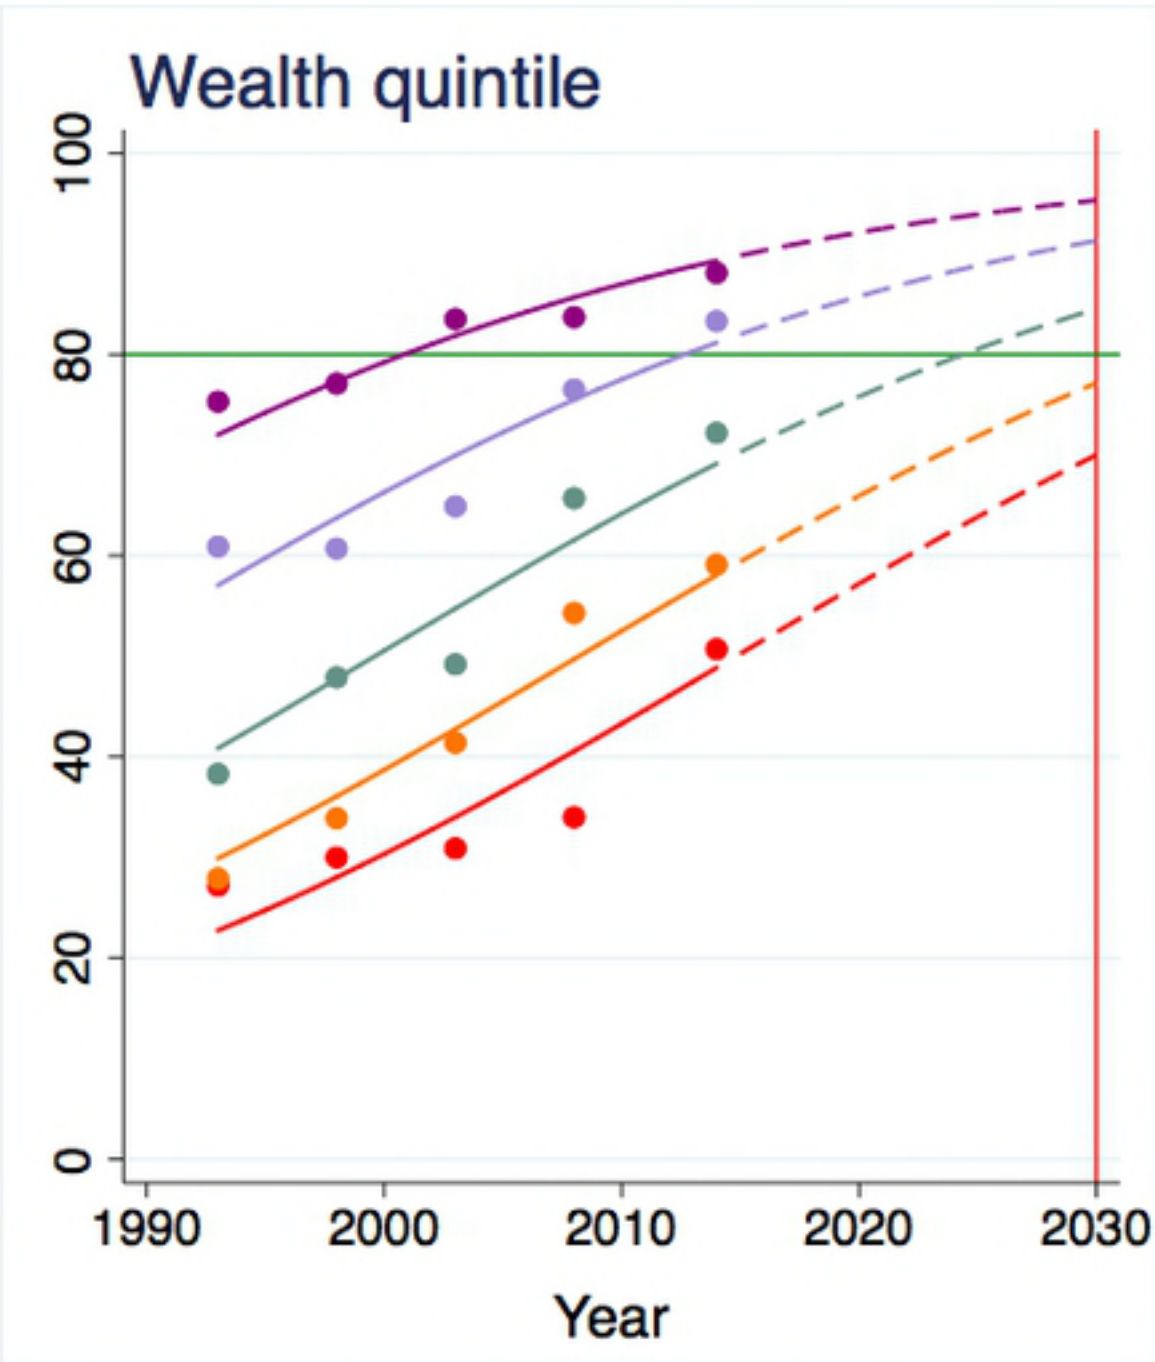

Source: https://www.biorxiv.org/content/10.1101/486159v1.full.pdf
